# Supplementary material for: Role of GD3-CLIPR-59 Association in Lymphoblastoid T Cell Apoptosis Triggered by CD95/Fas
Source: PubMed Central journal article supplement (PMC2797139; doi:10.1371/journal.pone.0008567), 2010-01-05
Supplement: pone.0008567.s001.pdf [file pone.0008567.s001.pdf]

## GD3/CLIPR FRET

| Untreated          | FL-2 | FL-3 | FL-4 |
|--------------------|------|------|------|
| neg PE             | 2    | 1,92 | 1,34 |
| GD3 PE             | 14,7 | 2,22 | 1,36 |
| neg Cy5            | 1,02 | 2,5  | 2,99 |
| CLIPR Cy5          | 2,6  | 4,1  | 21,5 |
| neg PE + neg Cy5   | 2,2  | 3,2  | 2,37 |
| GD3 PE + CLIPR Cy5 | 4,3  | 4,5  | 12,9 |

|                    | FL-2       | FL-3       | FL-4         | a               | b               | FRET           |
|--------------------|------------|------------|--------------|-----------------|-----------------|----------------|
| GD3 PE             | 12,7       | 0,3        | 0,02         | <b>42,33333</b> |                 |                |
| CLIPR Cy5          | 1,58       | 1,6        | 18,51        |                 | <b>11,56875</b> |                |
| GD3 PE + CLIPR Cy5 | <b>2,1</b> | <b>1,3</b> | <b>10,53</b> |                 |                 | <b>0,26168</b> |

| anti-Fas 15 min   | FL-2 | FL-3 | FL-4 |
|-------------------|------|------|------|
| neg PE            | 1,17 | 1,13 | 1,45 |
| GD3 PE            | 14,4 | 2,9  | 1,43 |
| neg Cy5           | 1,02 | 2,4  | 4,62 |
| CLPR Cy5          | 1,3  | 3,4  | 23,2 |
| neg PE + neg Cy5  | 1,06 | 1,35 | 5,48 |
| GD3 PE +CLIPR Cy5 | 4,2  | 12,2 | 5,9  |

|                      | FL-2        | FL-3         | FL-4        | a               | b            | FRET          |
|----------------------|-------------|--------------|-------------|-----------------|--------------|---------------|
| GD3 PE               | 13,23       | 1,77         | -0,02       | <b>7,474576</b> |              |               |
| tubulin Cy5          | 0,28        | 1            | 18,58       |                 | <b>18,58</b> |               |
| GD3 PE + tubulin Cy5 | <b>3,14</b> | <b>10,85</b> | <b>0,42</b> |                 |              | <b>0,9592</b> |

| anti-Fas 30 min | FL-2  | FL-3 | FL-4 |
|-----------------|-------|------|------|
| neg PE          | 1,5   | 1,27 | 1,35 |
| GD3 PE          | 14,05 | 2,7  | 1,31 |
| neg Cy5         | 1,3   | 6,4  | 4,24 |

|                    |       |      |       |
|--------------------|-------|------|-------|
| CLIPR Cy5          | 1,06  | 4,74 | 21,42 |
| neg PE + neg Cy5   | 1,21  | 1,63 | 1,75  |
| GD3 PE + CLIPR Cy5 | 12,36 | 2,19 | 12,81 |

|                      | FL-2  | FL-3  | FL-4  | a        | b        | FRET           |
|----------------------|-------|-------|-------|----------|----------|----------------|
| GD3 PE               | 12,55 | 1,43  | -0,04 | 8,776224 |          |                |
| tubulin Cy5          | -0,24 | -1,66 | 17,18 |          | -10,3494 |                |
| GD3 PE + tubulin Cy5 | 11,15 | 0,56  | 11,06 |          |          | <b>0,63961</b> |

| <b>anti-Fas 45 min</b> | <b>FL-2</b> | <b>FL-3</b> | <b>FL-4</b> |
|------------------------|-------------|-------------|-------------|
| neg PE                 | 1,6         | 1,2         | 1,6         |
| GD3 PE                 | 14,9        | 3,2         | 1,5         |
| neg Cy5                | 1,02        | 2,5         | 1,81        |
| CLIPR Cy5              | 1,02        | 1,7         | 21,9        |
| neg PE + neg Cy5       | 2           | 1,53        | 3,4         |
| GD3 PE + CLIPR Cy5     | 15,1        | 3,9         | 9,4         |

|                      | FL-2 | FL-3 | FL-4  | a    | b        | FRET           |
|----------------------|------|------|-------|------|----------|----------------|
| GD3 PE               | 13,3 | 2    | -0,1  | 6,65 |          |                |
| tubulin Cy5          | 0    | -0,8 | 20,09 |      | -25,1125 |                |
| GD3 PE + tubulin Cy5 | 13,1 | 2,37 | 6     |      |          | <b>0,26962</b> |

| <b>anti-Fas 60 min</b> | <b>FL-2</b> | <b>FL-3</b> | <b>FL-4</b> |
|------------------------|-------------|-------------|-------------|
| neg PE                 | 1,5         | 1,27        | 2,35        |
| GD3 PE                 | 14,2        | 3,7         | 2,31        |
| neg Cy5                | 2,3         | 6,4         | 2,24        |
| tubulin Cy5            | 1,06        | 4,74        | 21          |
| neg PE + neg Cy5       | 1,21        | 1,63        | 3,8         |
| GD3 PE + tubulin Cy5   | 15,36       | 3,19        | 20,81       |

|                      | FL-2  | FL-3  | FL-4  | a        | b        | FRET          |
|----------------------|-------|-------|-------|----------|----------|---------------|
| GD3 PE               | 12,7  | 2,43  | -0,04 | 5,226337 |          |               |
| tubulin Cy5          | -1,24 | -1,66 | 18,76 |          | -11,3012 |               |
| GD3 PE + tubulin Cy5 | 14,15 | 1,56  | 17,01 |          |          | <b>0,2293</b> |

Figure S1
