# Supplementary material for: Role of GD3-CLIPR-59 Association in Lymphoblastoid T Cell Apoptosis Triggered by CD95/Fas
Source: PubMed Central journal article supplement (PMC2797139; doi:10.1371/journal.pone.0008567), 2010-01-05
Supplement: pone.0008567.s002.pdf [file pone.0008567.s002.pdf]

| X Values<br>time | A   |          |      |      |      |      |      | B       |      |      |      |      |      |
|------------------|-----|----------|------|------|------|------|------|---------|------|------|------|------|------|
|                  | X   | controls |      |      |      |      |      | clipr59 |      |      |      |      |      |
|                  |     | A:Y1     | A:Y2 | A:Y3 | A:Y4 | A:Y5 | A:Y6 | B:Y1    | B:Y2 | B:Y3 | B:Y4 | B:Y5 | B:Y6 |
| 1                | 0   | 1.7      | 1.5  | 2.1  | 1.9  | 1.6  | 1.4  | 1.5     | 1.8  | 2.0  | 1.7  | 2.1  | 2.9  |
| 2                | 15  | 10.0     | 11.0 | 8.5  | 9.2  | 13.8 | 13.5 | 1.8     | 2.2  | 3.7  | 3.5  | 2.0  | 1.8  |
| 3                | 30  | 42.5     | 49.0 | 37.5 | 39.0 | 47.0 | 43.0 | 10.2    | 8.5  | 8.0  | 11.2 | 8.9  | 7.8  |
| 4                | 45  | 38.5     | 33.1 | 37.2 | 30.5 | 43.2 | 33.5 | 23.2    | 26.0 | 20.5 | 18.2 | 17.1 | 27.0 |
| 5                | 60  | 3.5      | 4.0  | 3.0  | 4.2  | 4.8  | 4.5  | 43.0    | 31.2 | 40.6 | 35.4 | 31.3 | 28.5 |
| 6                | 75  | 1.4      | 2.9  | 1.3  | 1.6  | 1.1  | 2.1  | 45.2    | 38.5 | 34.0 | 43.2 | 44.1 | 31.5 |
| 7                | 90  | 3.1      | 2.4  | 1.8  | 1.3  | 1.4  | 2.0  | 45.0    | 42.4 | 36.8 | 37.3 | 38.5 | 40.0 |
| 8                | 120 | 3.0      | 2.3  | 2.1  | 1.9  | 1.5  | 3.0  | 1.7     | 1.9  | 2.6  | 2.8  | 1.4  | 1.6  |

**A**

| Parameter                   | A                    | B              | C           | D                |
|-----------------------------|----------------------|----------------|-------------|------------------|
|                             | Data Set-A           | Data Set-B     | Data Set-C  | Data Set-D       |
|                             | Y                    | Y              | Y           | Y                |
| 1 Table Analyzed            | Data 3               |                |             |                  |
| 2                           |                      |                |             |                  |
| 3 Two-way RM ANOVA          | Matching by cols     |                |             |                  |
| 4                           |                      |                |             |                  |
| 5 Source of Variation       | % of total variation | P value        |             |                  |
| 6 Interaction               | 56.61                | P<0.0001       |             |                  |
| 7 Time                      | 37.03                | P<0.0001       |             |                  |
| 8 siRNA                     | 3.63                 | P<0.0001       |             |                  |
| 9 Subjects (matching)       | 0.4614               | 0.1893         |             |                  |
| 10                          |                      |                |             |                  |
| 11 Source of Variation      | P value summary      | Significant?   |             |                  |
| 12 Interaction              | ***                  | Yes            |             |                  |
| 13 Time                     | ***                  | Yes            |             |                  |
| 14 siRNA                    | ***                  | Yes            |             |                  |
| 15 Subjects (matching)      | ns                   | No             |             |                  |
| 16                          |                      |                |             |                  |
| 17 Source of Variation      | Df                   | Sum-of-squares | Mean square | F                |
| 18 Interaction              | 7                    | 14780          | 2111        | 249.0            |
| 19 Time                     | 7                    | 9668           | 1381        | 162.9            |
| 20 siRNA                    | 1                    | 948.2          | 948.2       | 78.70            |
| 21 Subjects (matching)      | 10                   | 120.5          | 12.05       | 1.421            |
| 22 Residual                 | 70                   | 593.5          | 8.478       |                  |
| 23                          |                      |                |             |                  |
| 24 Number of missing values | 0                    |                |             |                  |
| 25                          |                      |                |             |                  |
| 26 Bonferroni posttests     |                      |                |             |                  |
| 27                          |                      |                |             |                  |
| 28 controls vs. clipr59     |                      |                |             |                  |
| 29 siRNA                    | controls             | clipr59        | Difference  | 95% CI of diff.  |
| 30 0.0000                   | 1.700                | 2.000          | 0.3000      | -4.544 to 5.144  |
| 31 15.00                    | 11.00                | 2.500          | -8.500      | -13.34 to -3.656 |
| 32 30.00                    | 43.00                | 9.100          | -33.90      | -38.74 to -29.06 |
| 33 45.00                    | 36.00                | 22.00          | -14.00      | -18.84 to -9.156 |
| 34 60.00                    | 4.000                | 35.00          | 31.00       | 26.16 to 35.84   |
| 35 75.00                    | 1.733                | 39.42          | 37.68       | 32.84 to 42.53   |
| 36 90.00                    | 2.000                | 40.00          | 38.00       | 33.16 to 42.84   |
| 37 120.0                    | 2.300                | 2.000          | -0.3000     | -5.144 to 4.544  |
| 38                          |                      |                |             |                  |
| 39 siRNA                    | Difference           | t              | P value     | Summary          |
| 40 0.0000                   | 0.3000               | 0.1739         | P > 0.05    | ns               |
| 41 15.00                    | -8.500               | 4.928          | P<0.001     | ***              |
| 42 30.00                    | -33.90               | 19.65          | P<0.001     | ***              |
| 43 45.00                    | -14.00               | 8.117          | P<0.001     | ***              |
| 44 60.00                    | 31.00                | 17.97          | P<0.001     | ***              |
| 45 75.00                    | 37.68                | 21.85          | P<0.001     | ***              |
| 46 90.00                    | 38.00                | 22.03          | P<0.001     | ***              |
| 47 120.0                    | -0.3000              | 0.1739         | P > 0.05    | ns               |

**B**

| Source of Variation | DF   | Sum of Squares | Mean Square |
|---------------------|------|----------------|-------------|
| Interaction         | 7.0  | 14780          | 2111        |
| Time                | 7.0  | 9668           | 1381        |
| siRNA               | 1.0  | 948.2          | 948.2       |
| Subjects (matching) | 10.0 | 120.5          | 12.05       |
| Residual (Error)    | 70.0 | 593.5          | 8.478       |
| Total               | 95.0 | 26110          |             |

**Does Time have the same effect at all values of siRNA?**

Interaction accounts for 56.61% of the total variance.  
 $F = 249.03$ .  $DF_{N-1} DF_{D-1} = 70$   
 The P value is <0.0001  
 If there is no interaction overall, there is a less than 0.01% chance of randomly observing so much interaction in an experiment of this size. The interaction is considered extremely significant.

Since the interaction is statistically significant, the P values that follow for the row and column effects are difficult to interpret.

**Does siRNA affect the result? (Are the curves different?)**

siRNA accounts for 3.63% of the total variance (after adjusting for matching).  
 $F = 78.70$ .  $DF_{N-1} DF_{D-1} = 70$   
 The P value is <0.0001  
 If siRNA has no effect overall, there is a less than 0.01% chance of randomly observing an effect this big (or bigger) in an experiment of this size. The effect is considered extremely significant.

**Does Time affect the result? (Are the curves horizontal?)**

Time accounts for 37.03% of the total variance (after adjusting for matching).  
 $F = 162.89$ .  $DF_{N-1} DF_{D-1} = 70$   
 The P value is <0.0001  
 If Time has no effect overall, there is a less than 0.01% chance of randomly observing an effect this big (or bigger) in an experiment of this size. The effect is considered extremely significant.

**Was the matching effective?**

$F = 1.42$ .  $DF_{N-1} DF_{D-1} = 70$   
 The P value is 0.1893  
 If matching were not effective overall, there is a 19% chance of randomly observing an effect this big (or bigger) in an experiment of this size. The effect is considered not significant.

**C**

**Figure S2**
